# Supplementary material
Source: publisher figshare collection journal article supplement (https://frontiersin.figshare.com/ndownloader/files/26060726)
Supplement: Supplementary file [file 26060726]

**Figure S3** Polar lipids in *G. groenlandica* by thin-layer chromatography.

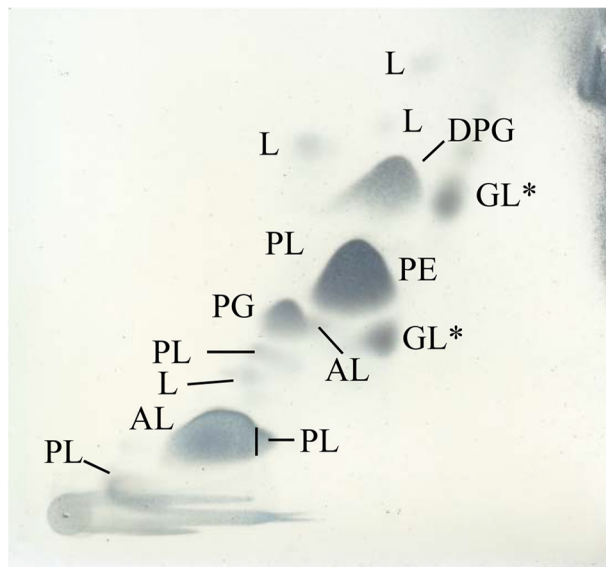

L = Lipid

AL = Aminolipid

PL = Phospholipid

PG = Phosphatidylglycerol

GL\* = Glycolipid and pigment

PE = Phosphatidylethanolamine

DPG = Diphosphatidylglycerol
